# Supplementary material
Source: publisher figshare collection journal article supplement (https://sage.figshare.com/ndownloader/files/12801299)
Supplement: Supplementary file 1 [file 12801299]

Supplementary Table 1: MHN Fan age and gender profile as of 5 February, 2018, according to Facebook Insights data

|               | Proportion<br>of all fans |
|---------------|---------------------------|
| <b>Gender</b> |                           |
| Male          | 16%                       |
| Female        | 83%                       |
| <b>Age</b>    |                           |
| 18 to 24      | 19%                       |
| 25 to 34      | 33%                       |
| 35 to 54      | 37%                       |
| 55+           | 9%                        |

Supplementary Table 2: Adjusted differences in mean engagement with MHN and with non-MHN health pages

|                                                         |                     | MHN                                                   |         | Non-MHN health pages                                  |         |
|---------------------------------------------------------|---------------------|-------------------------------------------------------|---------|-------------------------------------------------------|---------|
|                                                         |                     | Adjusted difference<br>in mean engagement<br>(95% CI) | P value | Adjusted difference<br>in mean engagement<br>(95% CI) | P value |
| <b>Gender</b>                                           |                     |                                                       |         |                                                       |         |
|                                                         | Male                | Ref                                                   |         | Ref                                                   |         |
|                                                         | Female              | -0.34 (-0.54, -0.13)                                  | 0.001   | -0.17 (-0.36, 0.02)                                   | 0.075   |
| <b>Age (per 1 year increase)</b>                        |                     | 0.01 (0.00, 0.01)                                     | 0.050   | 0.01 (0.01, 0.02)                                     | <0.001  |
| <b>Socio-economic status</b>                            |                     |                                                       |         |                                                       |         |
|                                                         | Least disadvantaged | Ref                                                   |         | Ref                                                   |         |
|                                                         | Most disadvantaged  | 0.13 (-0.03, 0.30)                                    | 0.110   | 0.11 (-0.03, 0.25)                                    | 0.126   |
| <b>Location</b>                                         |                     |                                                       |         |                                                       |         |
|                                                         | Urban               | Ref                                                   |         | Ref                                                   |         |
|                                                         | Regional/rural      | 0.11 (-0.04, 0.26)                                    | 0.137   | 0.00 (-0.13, 0.14)                                    | 0.983   |
| <b>Family with children</b>                             |                     |                                                       |         |                                                       |         |
|                                                         | No                  | Ref                                                   |         | Ref                                                   |         |
|                                                         | Yes                 | 0.04 (-0.10, 0.18)                                    | 0.587   | 0.11 (-0.02, 0.23)                                    | 0.093   |
| <b>Time on Facebook per day<br/>(per hour increase)</b> |                     | 0.05 (0.01, 0.10)                                     | 0.023   | 0.06 (0.03, 0.10)                                     | <0.001  |
| <b>Weight status</b>                                    |                     |                                                       |         |                                                       |         |
|                                                         | Healthy weight      | Ref                                                   |         | Ref                                                   |         |
|                                                         | Overweight          | -0.01 (-0.16, 0.13)                                   | 0.841   | 0.06 (-0.07, 0.18)                                    | 0.366   |
